# Supplementary material for: Salinity and Heavy Metal Tolerance, and Phytoextraction Potential of Ranunculus sceleratus Plants from a Sandy Coastal Beach
Source: MDPI journal article supplement (doi:10.3390/life12121959), 2022-11-23
Supplement: s1 [file s1]

**Salinity and heavy metal tolerance, and phytoextraction potential of *Ranunculus sceleratus* plants from sandy coastal beach**

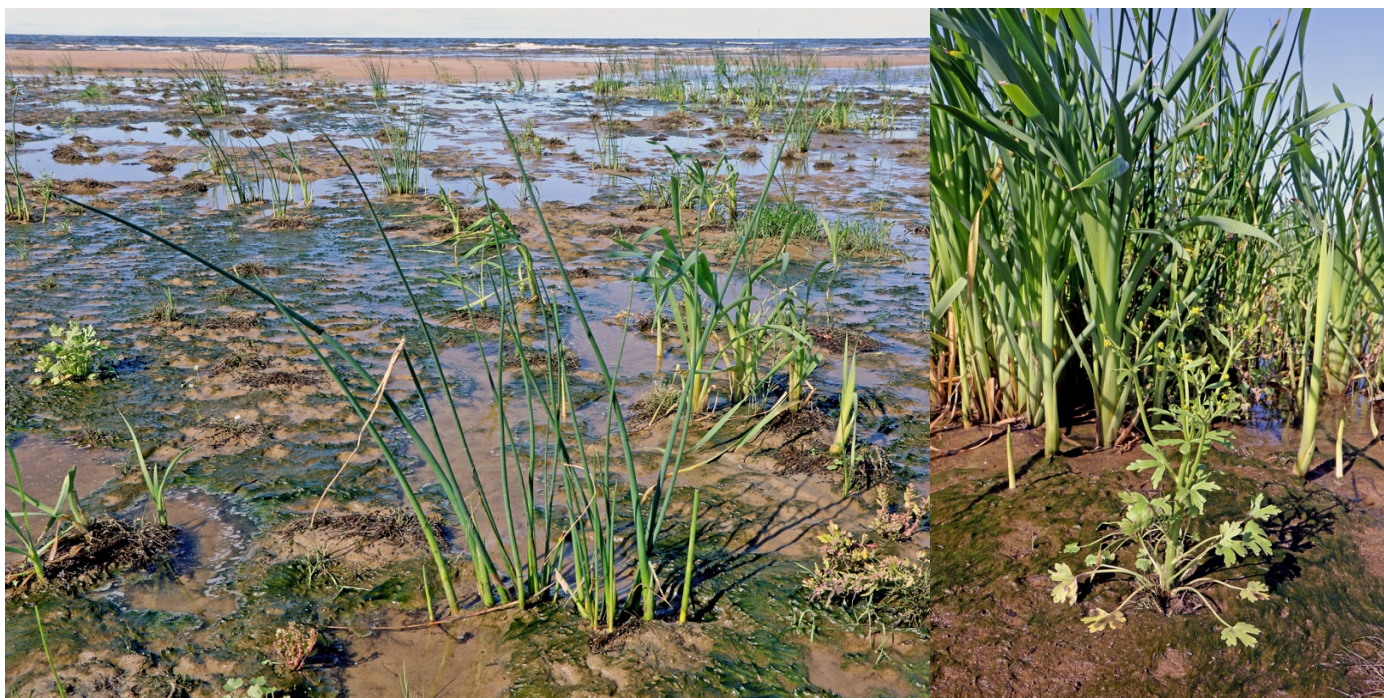

**Figure S1.** *Ranunculus sceleratus* plants in natural habitat.

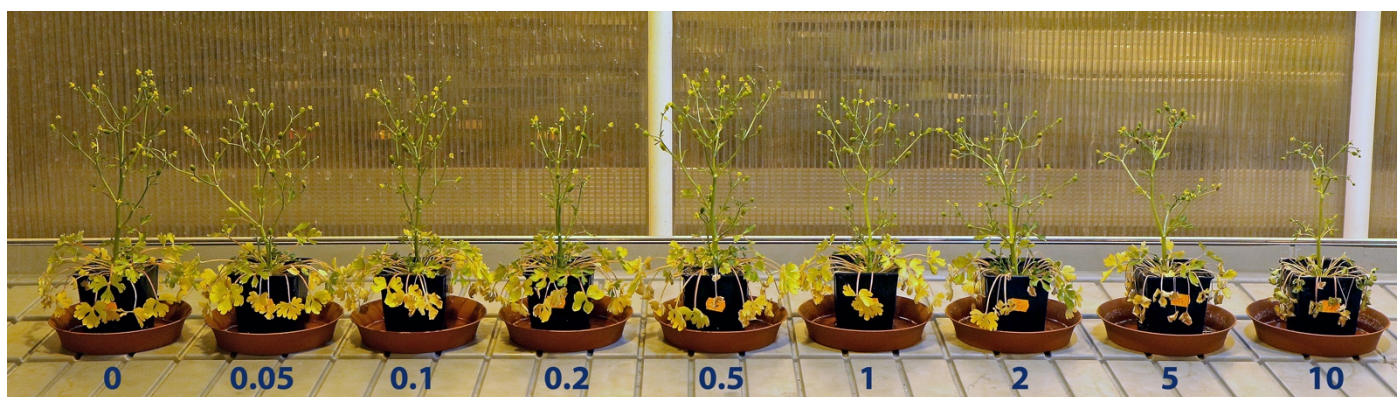

**Figure S2.** Typical *Ranunculus sceleratus* plants in Experiment 1, 5 weeks after full treatment with NaCl. Numbers indicate amount of  $\text{Na}^+$  ( $\text{g L}^{-1}$ ) added in a form of NaCl.

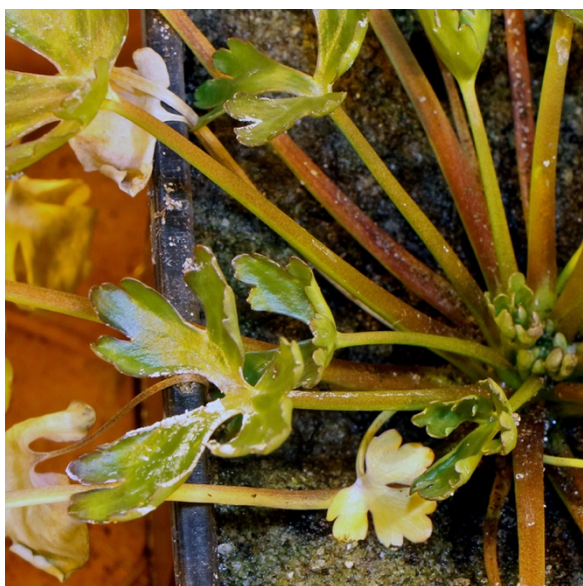

**Figure S3.** Crystalline NaCl deposition on leaf surface of *Ranunculus sceleratus* plants treated with  $10 \text{ g L}^{-1}$   $\text{Na}^+$  in Experiment 1, 5 weeks after full treatment with NaCl.



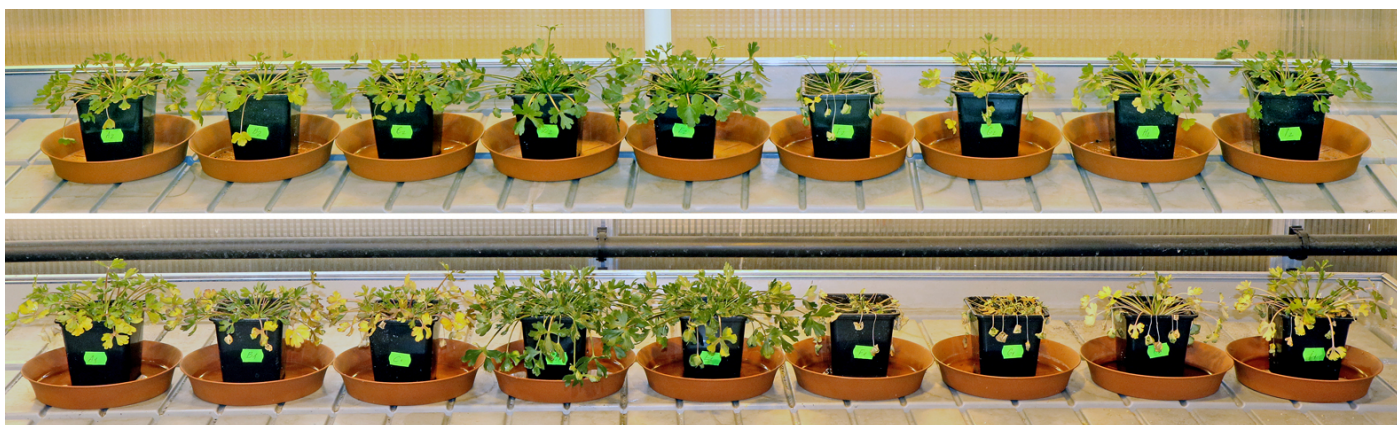

**Figure S4.** Typical *Ranunculus sceleratus* plants in Experiment 2, 2 (above) and 4 (below) weeks after full treatment. From left to right: control, NaCl, KCl, NaNO<sub>3</sub>, KNO<sub>3</sub>, NaNO<sub>2</sub>, KNO<sub>2</sub>, Na<sub>2</sub>CO<sub>3</sub>, K<sub>2</sub>CO<sub>3</sub>. All treatments contained 4.0 g L<sup>-1</sup> Na<sup>+</sup> or 6.8 g L<sup>-1</sup> K<sup>+</sup>.

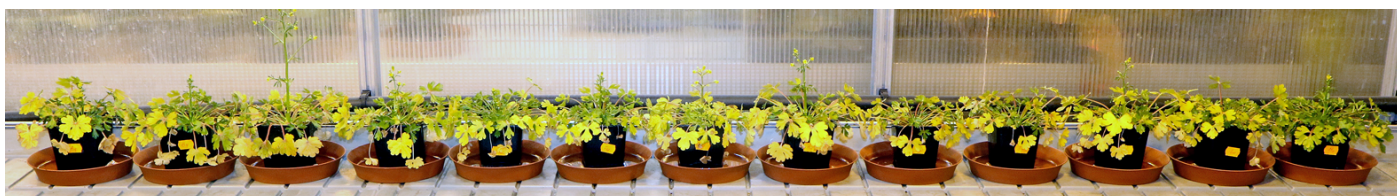

**Figure S5.** Typical *Ranunculus sceleratus* plants in Experiment 3, 5 weeks after full treatment. From left to right: control, Mn 200 mg L<sup>-1</sup>, Mn 500 mg L<sup>-1</sup>, Mn 1000 mg L<sup>-1</sup>, Cd 5 mg L<sup>-1</sup>, Cd 20 mg L<sup>-1</sup>, Cd 100 mg L<sup>-1</sup>, Zn 200 mg L<sup>-1</sup>, Zn 500 mg L<sup>-1</sup>, Zn 1000 mg L<sup>-1</sup>, Pb 100 mg L<sup>-1</sup>, Pb 200 mg L<sup>-1</sup>, Pb 500 mg L<sup>-1</sup>. Salts used for treatments were MnSO<sub>4</sub>, CdSO<sub>4</sub>, ZnSO<sub>4</sub> and Pb(NO<sub>3</sub>)<sub>2</sub>.



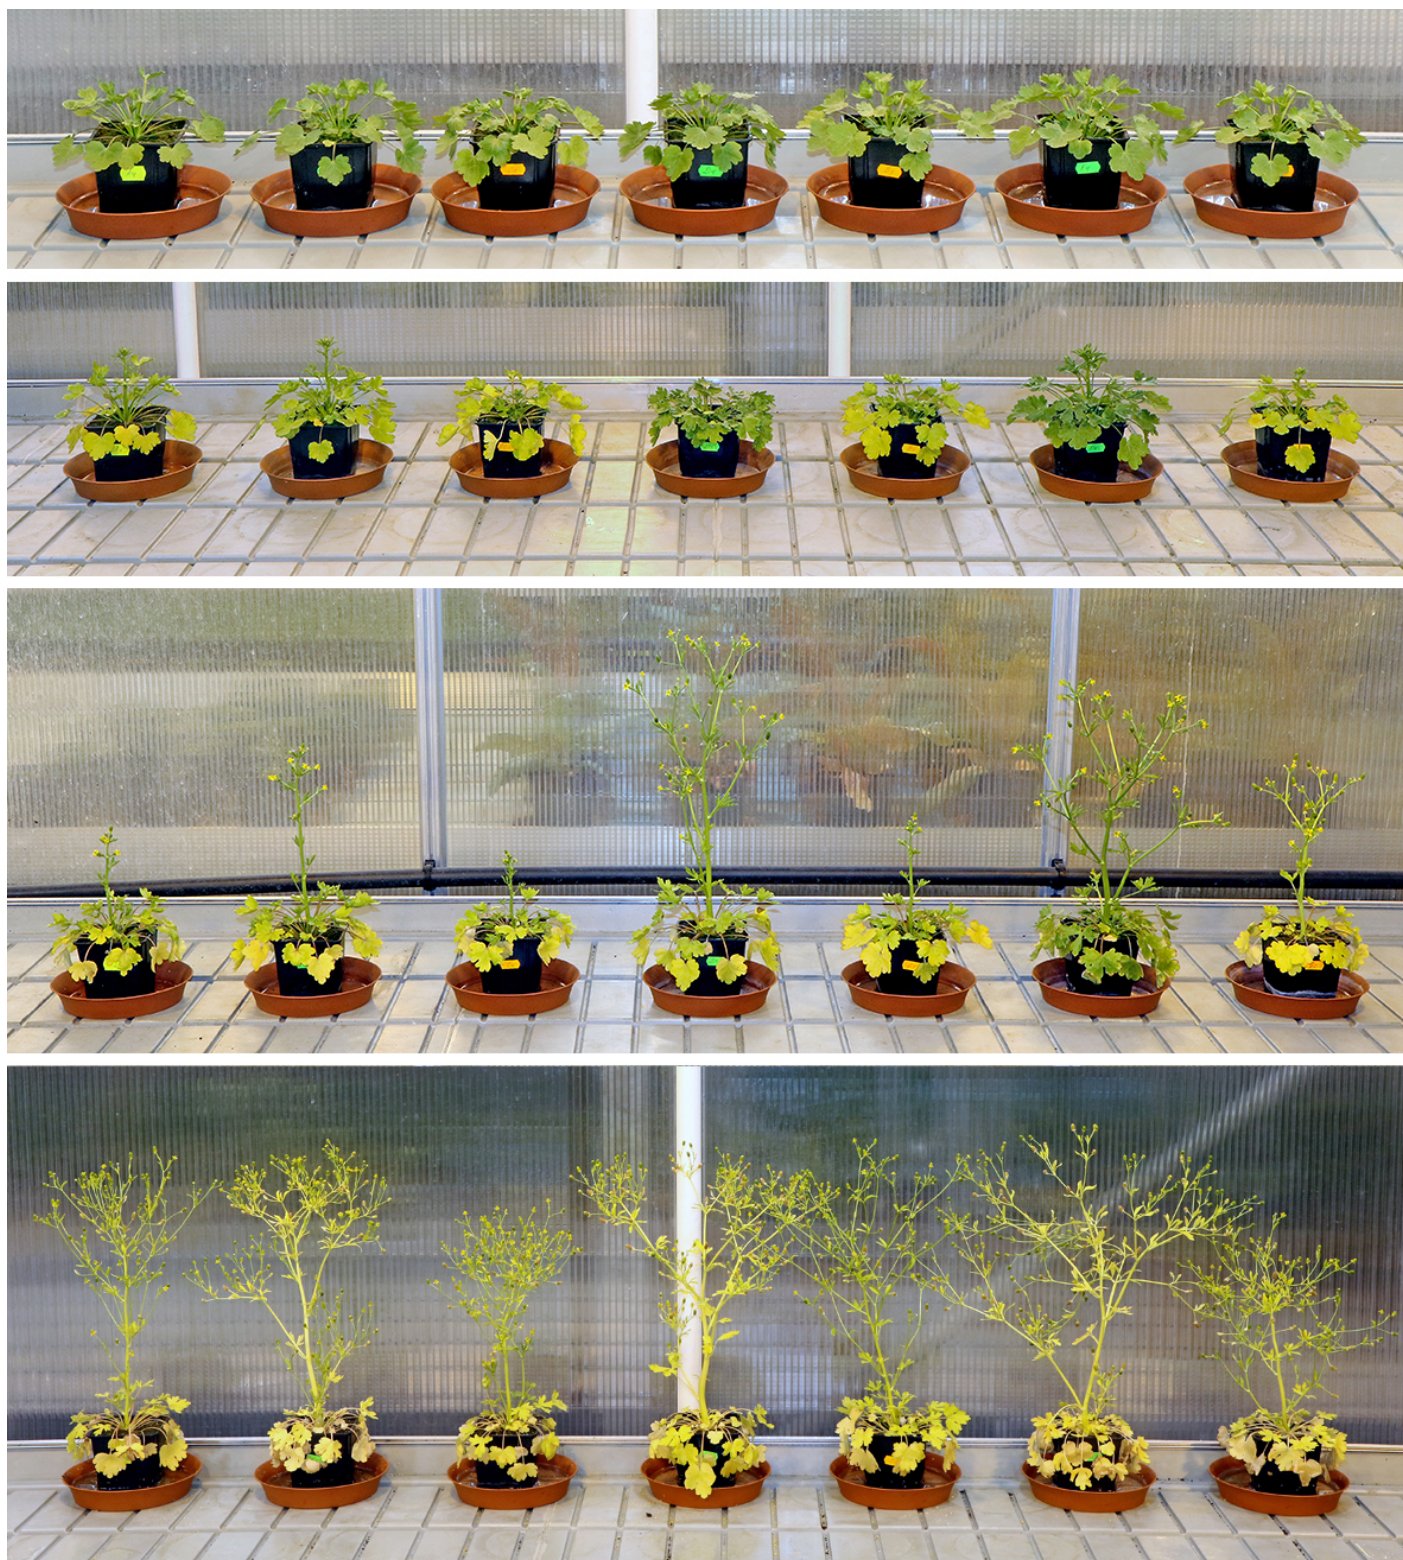

**Figure S6.** Typical *Ranunculus sceleratus* plants in Experiment 4. From top to bottom: 1, 3, 4, 7, weeks after full treatment. From left to right: control, 200 mg L<sup>-1</sup> Pb as nitrate, 200 mg L<sup>-1</sup> Pb as acetate, 500 mg L<sup>-1</sup> Pb as nitrate, 500 mg L<sup>-1</sup> Pb as acetate, 1000 mg L<sup>-1</sup> Pb as nitrate, 1000 mg L<sup>-1</sup> Pb as acetate.
